# Supplementary material for: CD11c+ MHCIIlo GM-CSF-bone marrow-derived dendritic cells act as antigen donor cells and as antigen presenting cells in neoepitope-elicited tumor immunity against a mouse fibrosarcoma
Source: Springer Nature journal article supplement (doi:10.1007/s00262-018-2202-4), 2018-07-20
Supplement: MOESM1 [file 15966144]

**Cancer Immunology, Immunotherapy (submitted in 2018)- Hakimeh Ebrahimi-Nik et. al**

**Supplementary Table 1.** Pathways that are significantly upregulated in P6 compared to P5 sub-populations by IPA

| Pathways                                                 | Genes           | Log <sub>2</sub> Fold Change (P6/P5) | P5 (TPM <sup>a</sup> ) | P6 (TPM <sup>a</sup> ) |
|----------------------------------------------------------|-----------------|--------------------------------------|------------------------|------------------------|
| <b>Acute Phase Response Signaling<br/>(25/158 genes)</b> | <b>C3</b>       | 1.1                                  | 335.9                  | 747                    |
|                                                          | <b>C1rb</b>     | 1.4                                  | 5.9                    | 15.4                   |
|                                                          | <b>C1s1</b>     | 2.9                                  | 1.3                    | 10                     |
|                                                          | <b>Cebpb</b>    | 1.7                                  | 109                    | 349.8                  |
|                                                          | <b>Cfb</b>      | 2.1                                  | 27.7                   | 123.8                  |
|                                                          | <b>Cp</b>       | 1.4                                  | 3.3                    | 8.7                    |
|                                                          | <b>Fn1</b>      | 1.3                                  | 123.3                  | 307.4                  |
|                                                          | <b>Fos</b>      | 2.2                                  | 15.6                   | 74.3                   |
|                                                          | <b>Hp</b>       | 2.5                                  | 54.9                   | 304.4                  |
|                                                          | <b>Il18</b>     | 2.1                                  | 4.1                    | 17.6                   |
|                                                          | <b>Il1a</b>     | 2.5                                  | 10.5                   | 58.3                   |
|                                                          | <b>Il1b</b>     | 1.6                                  | 51.2                   | 155.9                  |
|                                                          | <b>Il1r1</b>    | -1.1                                 | 5.3                    | 2.5                    |
|                                                          | <b>Il1rn</b>    | 1.1                                  | 136                    | 298.8                  |
|                                                          | <b>Il1f9</b>    | 2.5                                  | 4                      | 23.3                   |
|                                                          | <b>Jak2</b>     | -1.8                                 | 439.4                  | 125.6                  |
|                                                          | <b>Map3k14</b>  | -1.7                                 | 40.5                   | 12.1                   |
|                                                          | <b>Mras</b>     | -1.6                                 | 78.1                   | 26.2                   |
|                                                          | <b>Pik3cg</b>   | -1.3                                 | 110.3                  | 45                     |
|                                                          | <b>Saa3</b>     | 1.1                                  | 54.6                   | 116.8                  |
|                                                          | <b>Serpine1</b> | 2.6                                  | 1.2                    | 7.9                    |
|                                                          | <b>Serpinf1</b> | -3.7                                 | 3.8                    | 0.3                    |
|                                                          | <b>Socs2</b>    | -1.5                                 | 390.7                  | 139.3                  |
|                                                          | <b>Tcf4</b>     | -1.4                                 | 14.2                   | 5.3                    |
|                                                          | <b>Vwf</b>      | 1.4                                  | 8.2                    | 22.4                   |
| <b>TLR Signaling<br/>(12/72 genes)</b>                   | <b>Fos</b>      | 2.2                                  | 15.6                   | 74.3                   |
|                                                          | <b>Il18</b>     | 2.1                                  | 4.1                    | 17.6                   |
|                                                          | <b>Il1a</b>     | 2.5                                  | 10.5                   | 58.3                   |
|                                                          | <b>Il1b</b>     | 1.6                                  | 51.2                   | 155.9                  |
|                                                          | <b>Il1r1</b>    | -2.7                                 | 73.1                   | 11.1                   |
|                                                          | <b>Il1rn</b>    | 1.1                                  | 136                    | 298.8                  |
|                                                          | <b>Il1f9</b>    | 2.5                                  | 4                      | 23.3                   |
|                                                          | <b>Map3k14</b>  | -1.7                                 | 40.5                   | 12.1                   |
|                                                          | <b>Tlr2</b>     | 1.4                                  | 107.6                  | 282.3                  |
|                                                          | <b>Tlr7</b>     | 1.6                                  | 7.9                    | 24.8                   |
|                                                          | <b>Tlr9</b>     | -2.4                                 | 29.7                   | 5.5                    |
|                                                          | <b>Traf1</b>    | -1.4                                 | 10.6                   | 4                      |

<sup>a</sup> Transcripts per Million

**Supplementary Table 2.** Pathways that are significantly downregulated in P6 compared to P5 sub-populations by IPA

| Pathways                                    | Genes    | Log <sub>2</sub> Fold Change (P6/P5) | P5 (TPM <sup>a</sup> ) | P6 (TPM <sup>a</sup> ) |
|---------------------------------------------|----------|--------------------------------------|------------------------|------------------------|
| Dendritic Cell Maturation<br>(28/168 genes) | Ccr7     | -4.5                                 | 79.1                   | 3.5                    |
|                                             | Cd40     | -2.5                                 | 10.4                   | 1.8                    |
|                                             | Cd83     | -3.2                                 | 74.2                   | 7.8                    |
|                                             | Cd86     | -2.7                                 | 109.3                  | 16.4                   |
|                                             | Fcgr4    | 1.5                                  | 11.1                   | 31.7                   |
|                                             | Fgfr1    | -4.1                                 | 34.2                   | 2                      |
|                                             | Fscn1    | -5.1                                 | 40.1                   | 1.2                    |
|                                             | H2-Q6    | -1.1                                 | 17.2                   | 8                      |
|                                             | H2-DMb2  | -2.6                                 | 1495                   | 242.9                  |
|                                             | H2-Oa    | -2.5                                 | 65.7                   | 11.6                   |
|                                             | H2-Ob    | -4.8                                 | 60.4                   | 2.1                    |
|                                             | H2-Aa    | -3.8                                 | 5337.3                 | 385.1                  |
|                                             | H2-Ab1   | -3.5                                 | 3715.8                 | 323.6                  |
|                                             | H2-Ea-ps | -4.1                                 | 5228.8                 | 294.1                  |
|                                             | H2-Eb1   | -4.2                                 | 2511.4                 | 135.4                  |
|                                             | Il18     | 2.1                                  | 4.1                    | 17.6                   |
|                                             | Il1a     | 2.5                                  | 10.5                   | 58.3                   |
|                                             | Il1b     | 1.6                                  | 51.2                   | 155.9                  |
|                                             | Il1rn    | 1.1                                  | 136                    | 298.8                  |
|                                             | Il1f9    | 2.5                                  | 4                      | 23.3                   |
|                                             | Jak2     | -1.8                                 | 439.4                  | 125.6                  |
|                                             | Lepr     | -1.5                                 | 39.1                   | 13.7                   |
|                                             | Map3k14  | -1.7                                 | 40.5                   | 12.1                   |
|                                             | Pik3cg   | -1.3                                 | 110.3                  | 45                     |
|                                             | Plcl1    | -1.2                                 | 7.3                    | 3.1                    |
|                                             | Stat4    | -3.4                                 | 4.1                    | 0.4                    |
|                                             | Tlr2     | 1.4                                  | 107.6                  | 282.3                  |
|                                             | Tlr9     | -2.4                                 | 29.7                   | 5.5                    |
| Integrin Signaling<br>(20/211 genes)        | Cav1     | 1.6                                  | 1                      | 3.2                    |
|                                             | Ctnn     | -1.1                                 | 11.9                   | 5.4                    |
|                                             | Fgfr1    | -4.1                                 | 34.2                   | 2                      |
|                                             | Fyn      | -3.1                                 | 62.3                   | 7.1                    |
|                                             | Itga2b   | -1.1                                 | 4                      | 1.9                    |
|                                             | Itgae    | -2.6                                 | 11.1                   | 1.8                    |
|                                             | Itgax    | -1.2                                 | 780.5                  | 328.4                  |
|                                             | Itgb7    | -1.1                                 | 261.3                  | 125.1                  |
|                                             | Mras     | -1.6                                 | 78.1                   | 26.2                   |
|                                             | Mylk     | -3.6                                 | 2.6                    | 0.2                    |
|                                             | Pak1     | -1.5                                 | 15.8                   | 5.6                    |
|                                             | Pdgfb    | -1.7                                 | 10.3                   | 3.1                    |
|                                             | Pik3cg   | -1.3                                 | 110.3                  | 45                     |
|                                             | Ppp1r12a | -1.1                                 | 64.6                   | 30.4                   |
|                                             | Ptk2     | -1.9                                 | 9.9                    | 2.6                    |
|                                             | Tln2     | 2                                    | 2.2                    | 8.8                    |
|                                             | Tlr9     | -2.4                                 | 29.7                   | 5.5                    |
|                                             | Tspan2   | -3.1                                 | 11.8                   | 1.3                    |
|                                             | Tspan4   | 1.1                                  | 9.7                    | 21.4                   |
|                                             | Tspan7   | -1.3                                 | 1.1                    | 0.4                    |
| ERK/MAPK Signaling<br>(16/191 genes)        | Esr1     | -1                                   | 29                     | 14.2                   |
|                                             | Fgfr1    | -4.1                                 | 34.2                   | 2                      |
|                                             | Fos      | 2.2                                  | 15.6                   | 74.3                   |
|                                             | Fyn      | -3.1                                 | 62.3                   | 7.1                    |
|                                             | Mras     | -1.6                                 | 78.1                   | 26.2                   |
|                                             | Pak1     | -1.5                                 | 15.8                   | 5.6                    |
|                                             | Pik3cg   | -1.3                                 | 110.3                  | 45                     |
|                                             | Pparg    | 1.5                                  | 18.2                   | 52.4                   |
|                                             | Ppm1j    | -1.6                                 | 4.4                    | 1.4                    |
|                                             | Ppp1r14a | -3.5                                 | 7.4                    | 0.6                    |
|                                             | Prkar2a  | -1.2                                 | 71.1                   | 31.8                   |
|                                             | Prkcb    | -1.3                                 | 107.7                  | 43.6                   |
|                                             | Prkcg    | -1.1                                 | 3.2                    | 1.4                    |
|                                             | Ptk2     | -1.9                                 | 9.9                    | 2.6                    |
|                                             | Tln2     | 2                                    | 2.2                    | 8.8                    |
|                                             | Tlr9     | -2.4                                 | 29.7                   | 5.5                    |

<sup>a</sup> Transcripts per Million

**Supplementary Figure 1.**

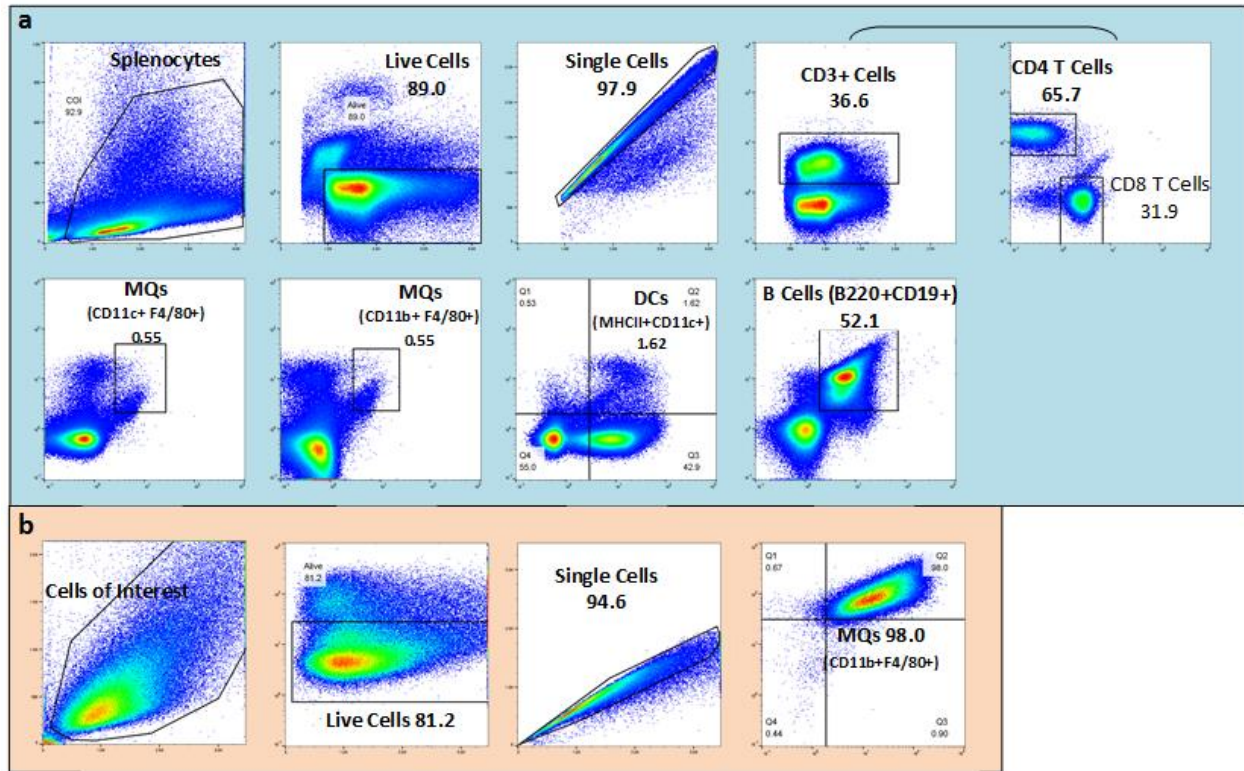

The phenotype of BALB/cJ splenocytes (a) and bone marrow derived macrophages (b). Boxes represents gates and percentage of cells in each gate.

## Supplementary Figure 2.

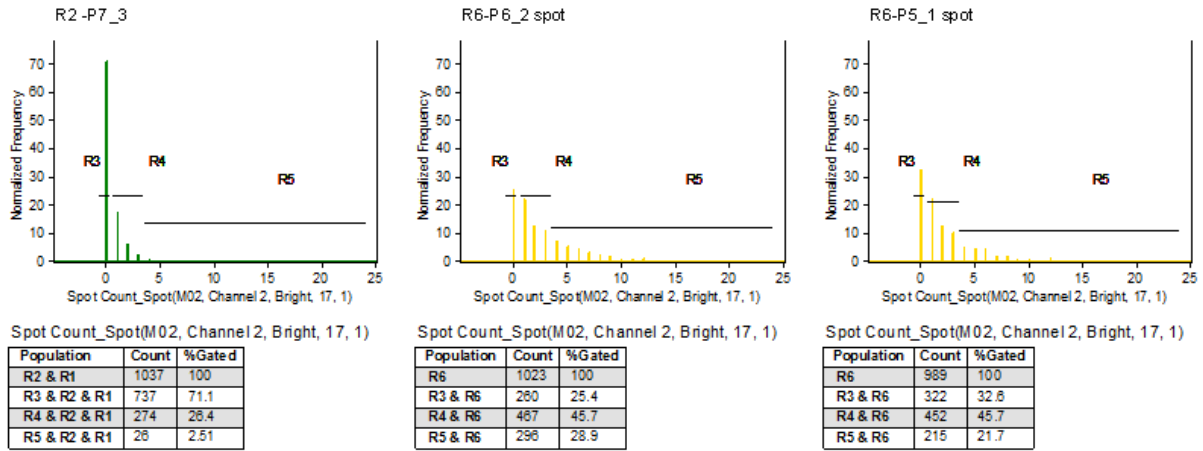

Using ImageStreamX Mark II Imaging Flow Cytometer the number of the beads in each sub population were quantified. X-axis shows the number of beads and Y-axis indicates the percentage of the cells. R3 gate is representative of the cells that were not able to take up any beads. R4 shows the percentage of the cells that took up 1-3 beads and R5 represents the percentage of the cells that had more than 3 beads. The tables shows the statistics for each graph.
